# Supplementary material
Source: publisher figshare collection journal article supplement (https://acs.figshare.com/ndownloader/files/15265376)

## Supporting Information

### **Figure S1** *Supplemental information of Gut microbiome analysis of sesamol-treated HFD-feeding mice*

(A) Principal Coordinate Analysis (PCoA) based on binary jaccard distance, permutation test from Adonis was used to test difference between groups (the colored ellipse denoted a 80% confidence within each group); (B) Linear discriminant analysis (LDA) was set up with 0.05 as alpha value for Wilcoxon test and then selected OTUs with LDA scores above 3; Data presented as mean  $\pm$  SEM, and significance different from each other (n = 5) \*p<0.05, \*\*p<0.01.

### **Figure S2** *Correlation analysis of cognitive function, SCFAs, and representative gut microbe*

To assess potential correlations between parameters in (A) wildtype and (B) ApoE knockout mice, two-tailed Pearson correlation calculations were analyzed using RStudio software. Red circles represent positive correlation, and blue circles represent negative correlation. The numbers in the forms represent the r value in Pearson correlation analysis.

Figure S1

A

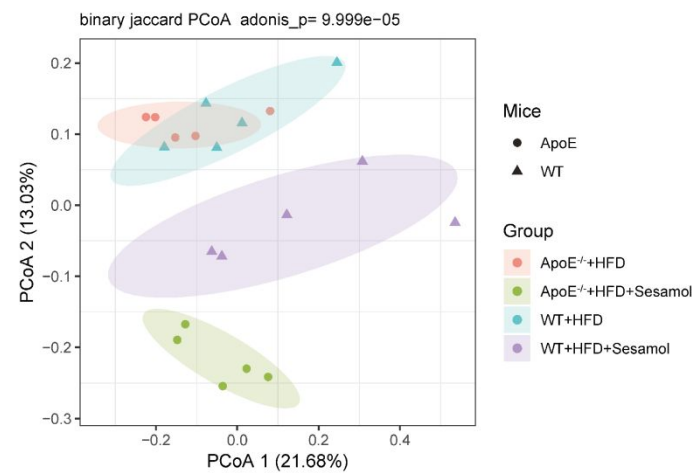

B

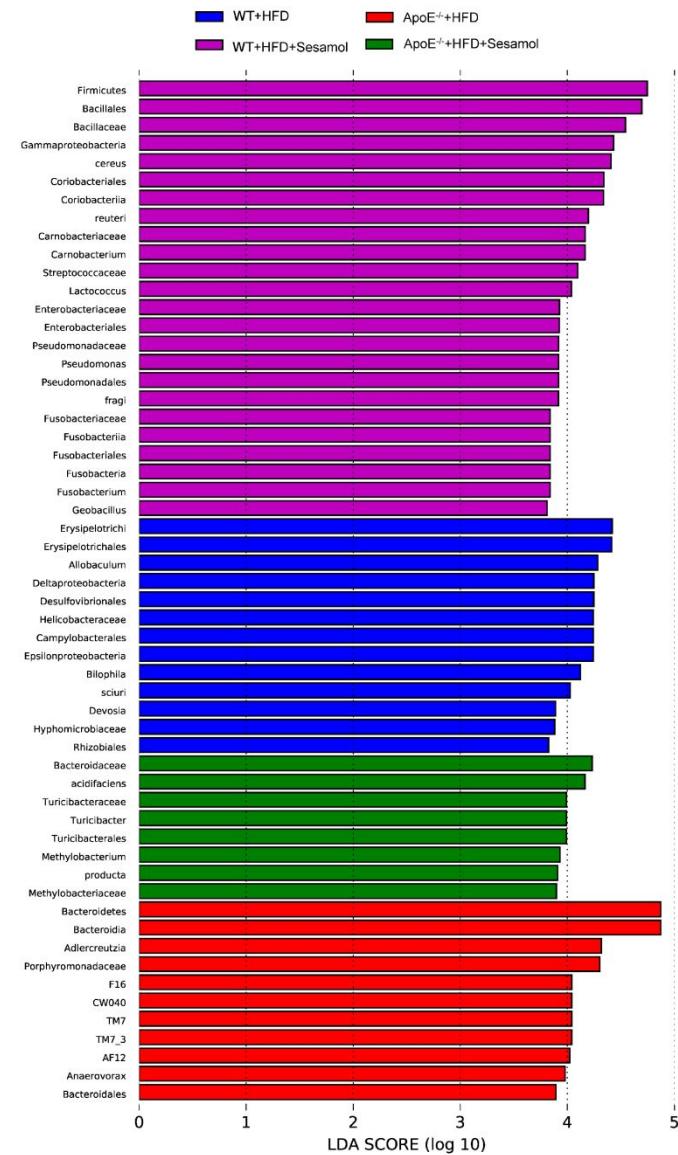

Figure S2

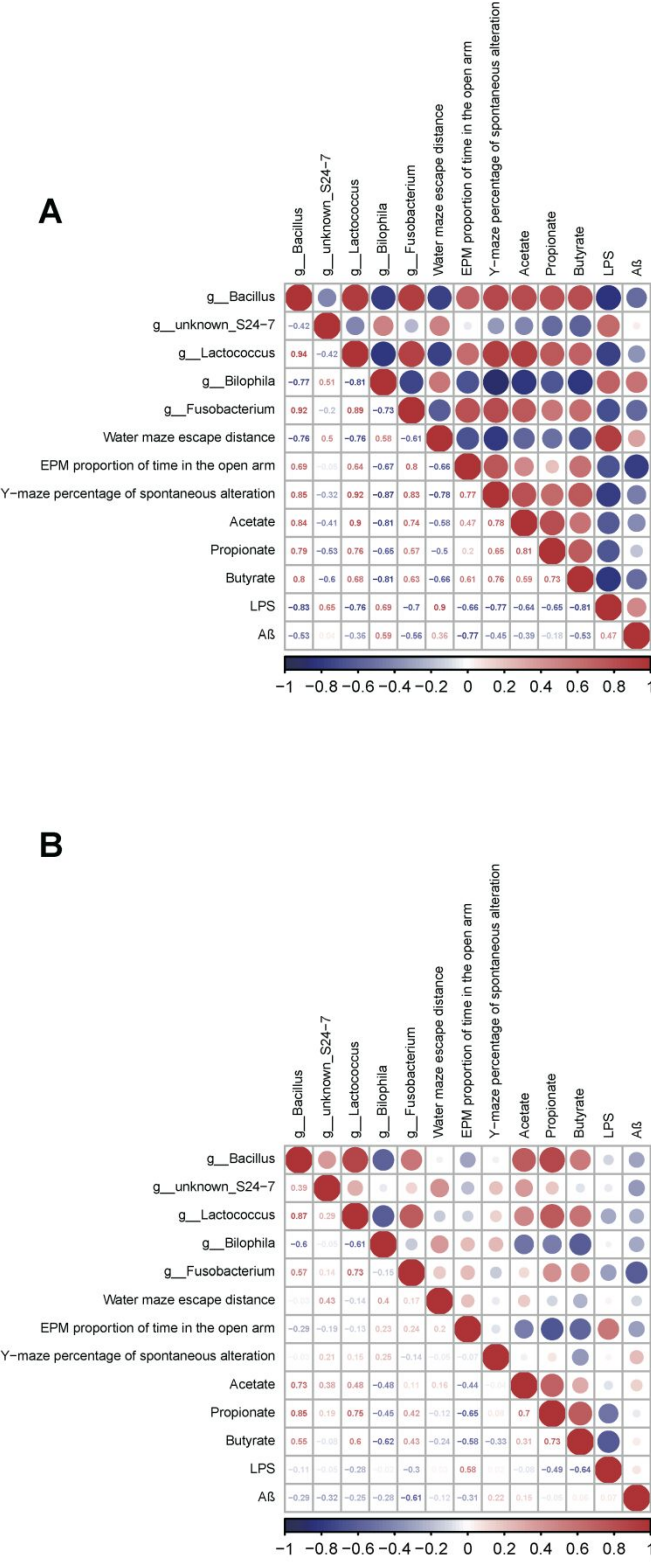

Supplement: Supplementary file 1 [file 15265376]
